# Supplementary material for: Water-induced aggregation and hydrophobic hydration in aqueous solutions of N-methylpiperidine
Source: Royal Society of Chemistry journal article supplement (doi:10.1039/c3ra43168a), 2013-01-01
Supplement: c3ra43168a.pdf [file c3ra43168a.pdf]

Supplementary information to “**Water-induced aggregation and hydrophobic hydration in aqueous solutions of N-methylpiperidine**” by W. Marczak, M. Łężniak, M. Zorębski, P. Lodowski, A. Przybyła, D. Truszkowska, and L. Almásy

Mole fractions and temperatures of the cloud points for N-methylpiperidine (1) + water (2)

| $x_1$  | $T / \text{K}$ |
|--------|----------------|
| 0.0147 | 327.56         |
| 0.0181 | 322.48         |
| 0.0199 | 321.05         |
| 0.0225 | 320.22         |
| 0.0248 | 320.01         |
| 0.0267 | 319.65         |
| 0.0300 | 317.65         |
| 0.0595 | 316.65         |
| 0.0795 | 316.65         |
| 0.0991 | 316.65         |
| 0.1301 | 317.25         |
| 0.1501 | 318.65         |
| 0.1797 | 320.49         |
| 0.1992 | 321.94         |
| 0.2191 | 323.70         |
| 0.2507 | 325.99         |
| 0.2804 | 326.44         |
| 0.3002 | 329.35         |
| 0.3311 | 330.34         |
| 0.3509 | 333.75         |
| 0.3802 | 336.35         |
| 0.4014 | 339.75         |
| 0.4396 | 340.88         |
| 0.4814 | 342.56         |

Reduced ultrasonic absorption,  $\alpha v^{-2} \times 10^{15} / (\text{s}^2 \text{m}^{-1})$ , in N-methylpiperidine (1) + water (2) at  $T = 293.15 \text{ K}$

| $\nu / \text{MHz}$ | $x_1$ |        |       |       |       |       |     |
|--------------------|-------|--------|-------|-------|-------|-------|-----|
|                    | 0     | 0.0051 | 0.030 | 0.070 | 0.100 | 0.300 | 1   |
| 10.00              | 27.71 | 120.4  | 1668  | 1276  | 972   | 487   | 239 |
| 12.51              | 26.62 | 115.5  | 1514  | 1211  | 917   | 429   | 239 |
| 15.01              | 26.60 | 108.4  | 1375  | 1136  | 885   | 400   | 233 |
| 18.01              | 25.79 | 103.4  | 1234  | 1072  | 832   | 368   | 229 |
| 22.12              | 25.28 | 93.8   | 1071  | 988   | 777   | 343   | 220 |
| 26.58              | 24.56 | 86.8   | 935   | 919   | 737   | 325   | 210 |
| 30.00              | 28.34 | 86.4   | 878   | 860   | 695   | 321   | 200 |
| 39.00              | 26.93 | 69.9   | 698   | 762   | 627   | 296   | 189 |
| 47.00              | 26.64 | 60.6   | 574   | 684   | 575   | 283   | 173 |
| 56.00              | 25.91 | 53.3   | 477   | 608   | 526   | 271   | 157 |
| 69.00              | 25.78 | 46.0   | 376   | 525   | 471   | 255   | 139 |
| 79.00              | 25.91 | 41.9   | 324   | 475   | 438   | 247   | 128 |
| 100.00             | 26.14 | 37.2   | 253   | 407   | 390   | 235   | 117 |

| $\nu / \text{MHz}$ | $x_1$ |       | $\nu / \text{MHz}$ | $x_1$ |
|--------------------|-------|-------|--------------------|-------|
|                    | 0.020 | 0.040 |                    | 0.050 |
| 12.50              | 496   | 1592  | 12.50              | 1501  |
| 15.05              | 438   | 1463  | 15.01              | 1391  |
| 18.00              | 435   | 1334  | 18.00              | 1263  |
| 22.12              | 384   | 1180  | 22.12              | 1175  |
| 26.59              | 365   | 1062  | 26.59              | 1077  |
| 30.00              | 355   | 995   | 30.00              | 987   |
| 39.00              | 294   | 833   | 39.00              | 849   |
| 47.00              | 249   | 724   | 47.00              | 737   |
| 56.00              | 210   | 614   | 56.00              | 640   |
| 69.00              | 168   | 498   | 69.00              | 530   |
| 79.00              | 147   | 433   | 79.00              | 467   |
| 100.00             | 114   | 344   | 100.00             | 383   |

| $\nu / \text{MHz}$ | $x_1$ |       |       |
|--------------------|-------|-------|-------|
|                    | 0.500 | 0.700 | 0.900 |
| 10.00              | 431   | 346   | 254   |
| 12.51              | 383   | 327   | 254   |
| 15.01              | 341   | 303   | 248   |
| 18.01              | 298   | 278   | 240   |
| 22.12              | 258   | 244   | 228   |
| 26.58              | 228   | 219   | 212   |
| 30.00              | 209   | 202   | 204   |
| 36.06              | 190   | 171   | 183   |
| 39.55              | 180   | 158   |       |
| 45.03              | 170   | 150   | 162   |
| 52.50              | 161   | 136   | 146   |
| 60.10              | 151   | 124   | 134   |
| 69.94              | 141   | 113   | 124   |
| 79.14              | 135   | 108   | 113   |

Densities of the system N-methylpiperidine (1) + water (2)

| $x_1$   | $t / ^\circ\text{C}$ | $\rho / (\text{kg m}^{-3})$ | $x_1$   | $t / ^\circ\text{C}$ | $\rho / (\text{kg m}^{-3})$ | $x_1$          | $t / ^\circ\text{C}$ | $\rho / (\text{kg m}^{-3})$ |
|---------|----------------------|-----------------------------|---------|----------------------|-----------------------------|----------------|----------------------|-----------------------------|
| 0.00034 | 15.005               | 998.924                     | 0.07007 | 15.005               | 967.542                     | 0.39772        | 15.004               | 882.524                     |
|         | 19.998               | 998.026                     |         | 19.995               | 964.078                     |                | 19.998               | 877.931                     |
|         | 24.996               | 996.864                     |         | 24.995               | 960.542                     |                | 24.995               | 873.284                     |
|         | 29.996               | 995.466                     |         | 29.999               | 956.915                     |                | 29.996               | 868.596                     |
|         | 34.996               | 993.852                     |         | 34.996               | 953.161                     |                | 34.994               | 863.859                     |
|         | 39.996               | 992.018                     |         | 39.995               | 949.217                     |                | 39.997               | 859.072                     |
| 0.00067 | 15.005               | 998.743                     | 0.07999 | 15.002               | 963.208                     | 0.49990        | 15.006               | 866.879                     |
|         | 19.998               | 997.843                     |         | 19.998               | 959.605                     |                | 19.998               | 862.309                     |
|         | 24.997               | 996.677                     |         | 24.996               | 955.930                     |                | 24.995               | 857.696                     |
|         | 29.996               | 995.274                     |         | 29.994               | 952.163                     |                | 29.996               | 853.046                     |
|         | 34.995               | 993.656                     |         | 34.994               | 948.275                     |                | 34.995               | 848.353                     |
|         | 39.999               | 991.785                     |         | 39.997               | 944.199                     |                | 39.998               | 843.623                     |
| 0.00364 | 15.006               | 997.244                     | 0.09000 | 15.005               | 958.986                     | 0.59999        | 15.002               | 854.228                     |
|         | 19.996               | 996.297                     |         | 19.998               | 955.264                     |                | 19.998               | 849.708                     |
|         | 24.994               | 995.088                     |         | 24.995               | 951.466                     |                | 24.995               | 845.146                     |
|         | 29.999               | 993.639                     |         | 29.996               | 947.581                     |                | 29.994               | 840.551                     |
|         | 34.996               | 991.970                     |         | 34.994               | 943.570                     |                | 34.994               | 835.924                     |
|         | 39.995               | 990.103                     |         | 39.998               | 939.491                     |                | 40.000               | 831.256                     |
| 0.01002 | 15.005               | 994.688                     | 0.09996 | 15.002               | 955.153                     | 0.69954        | 15.005               | 843.321                     |
|         | 19.995               | 993.566                     |         | 19.998               | 951.334                     |                | 19.996               | 838.839                     |
|         | 24.995               | 992.180                     |         | 24.995               | 947.434                     |                | 24.994               | 834.319                     |
|         | 29.995               | 990.559                     |         | 29.995               | 943.446                     |                | 29.995               | 829.771                     |
|         | 34.999               | 988.717                     |         | 34.994               | 939.340                     |                | 34.996               | 825.187                     |
|         | 39.996               | 986.673                     |         |                      |                             |                | 39.995               | 820.573                     |
| 0.02001 | 15.004               | 991.484                     | 0.15027 | 15.005               | 937.534                     | 0.79981        | 15.005               | 834.283                     |
|         | 19.994               | 989.799                     |         | 19.995               | 933.357                     |                | 19.994               | 829.821                     |
|         | 24.995               | 987.844                     |         | 24.994               | 929.101                     |                | 24.998               | 825.324                     |
|         | 29.995               | 985.656                     |         | 29.995               | 924.764                     |                | 29.996               | 820.802                     |
|         | 34.999               | 983.269                     |         | 34.999               | 920.320                     |                | 34.996               | 816.253                     |
|         | 39.995               | 980.695                     |         | 39.996               | 915.744                     |                | 39.995               | 811.673                     |
| 0.03066 | 15.004               | 986.974                     | 0.17554 | 15.001               | 930.051                     | 0.89918        | 15.006               | 826.487                     |
|         | 19.993               | 984.544                     |         | 19.998               | 925.764                     |                | 19.998               | 822.037                     |
|         | 24.999               | 981.967                     |         | 24.994               | 921.397                     |                | 24.997               | 817.556                     |
|         | 29.996               | 979.252                     |         | 29.995               | 916.951                     |                | 29.995               | 813.057                     |
|         | 34.996               | 976.395                     |         | 34.998               | 912.412                     |                | 34.995               | 808.536                     |
|         | 39.995               | 973.377                     |         | 39.996               | 907.753                     |                | 39.995               | 803.991                     |
| 0.04001 | 15.005               | 982.637                     | 0.20002 | 15.005               | 923.044                     | 1 <sup>a</sup> | 15.002               | 819.673                     |
|         | 19.996               | 979.857                     |         | 19.996               | 918.739                     |                | 19.998               | 815.251                     |
|         | 24.995               | 976.975                     |         | 24.994               | 914.301                     |                | 24.994               | 810.808                     |
|         | 29.995               | 973.988                     |         | 29.996               | 909.778                     |                | 29.996               | 806.353                     |
|         | 34.998               | 970.870                     |         | 34.994               | 905.170                     |                | 34.996               | 801.884                     |
|         | 39.994               | 967.579                     |         | 39.995               | 900.461                     |                | 39.998               | 797.400                     |
| 0.05001 | 15.005               | 977.205                     | 0.20706 | 15.005               | 921.495                     | 1              | 15.005               | 819.748                     |
|         | 19.995               | 974.124                     |         | 19.999               | 917.107                     |                | 19.998               | 815.326                     |
|         | 24.994               | 970.962                     |         | 24.994               | 912.641                     |                | 24.995               | 810.886                     |
|         | 29.995               | 967.710                     |         | 29.995               | 908.100                     |                | 29.995               | 806.431                     |
|         | 34.995               | 964.362                     |         | 34.994               | 903.476                     |                | 34.994               | 801.965                     |
|         | 39.995               | 961.059                     |         | 39.996               | 898.751                     |                | 39.995               | 797.479                     |
| 0.06008 | 15.004               | 972.117                     | 0.29993 | 15.002               | 900.756                     |                |                      |                             |
|         | 19.995               | 968.821                     |         | 19.998               | 896.209                     |                |                      |                             |
|         | 24.995               | 965.451                     |         | 24.995               | 891.596                     |                |                      |                             |
|         | 29.995               | 961.986                     |         | 29.996               | 886.927                     |                |                      |                             |
|         | 34.998               | 958.400                     |         | 34.994               | 882.197                     |                |                      |                             |
|         | 39.996               | 954.750                     |         | 39.994               | 877.397                     |                |                      |                             |

<sup>a</sup>chemical used in the thermodynamic experiments

Coefficients  $a_i$  for the molar volume polynomials of N-methylpiperidine (1) + water (2):

$$\ln V / (\text{m}^3 \text{mol}^{-1}) = \sum_{i=0}^2 a_i (T / \text{K} - 298.15)^i \quad (\text{Eq. 6})$$

in the temperature range  $T = (288.15 - 315.15)$  K, with the average absolute deviations of the back-calculated densities  $\delta$

| $x_1$          | $a_0$   | $a_1 \times 10^4$ | $a_2 \times 10^6$ | $\delta / (\text{kg m}^{-3})$ |
|----------------|---------|-------------------|-------------------|-------------------------------|
| 0.00034        | 2.89589 | 2.54728           | 4.68731           | 0.008                         |
| 0.00067        | 2.89755 | 2.55886           | 4.81069           | 0.005                         |
| 0.00364        | 2.91243 | 2.65034           | 4.66535           | 0.010                         |
| 0.01002        | 2.94322 | 3.01026           | 4.68173           | 0.009                         |
| 0.02001        | 2.98979 | 4.16058           | 4.55624           | 0.014                         |
| 0.03066        | 3.03879 | 5.39265           | 3.10422           | 0.004                         |
| 0.04001        | 3.08023 | 6.03160           | 2.73843           | 0.015                         |
| 0.05001        | 3.12388 | 6.60224           | 1.56354           | 0.017                         |
| 0.06008        | 3.16593 | 7.10168           | 2.19007           | 0.006                         |
| 0.07007        | 3.20581 | 7.49786           | 2.71609           | 0.023                         |
| 0.07999        | 3.24401 | 7.82335           | 2.70412           | 0.020                         |
| 0.09000        | 3.28132 | 8.10113           | 2.28835           | 0.006                         |
| 0.09996        | 3.31700 | 8.34611           | 2.32569           | 0.005                         |
| 0.15027        | 3.48175 | 9.27312           | 2.52528           | 0.013                         |
| 0.17554        | 3.55574 | 9.58023           | 2.42999           | 0.009                         |
| 0.20002        | 3.62325 | 9.78579           | 2.57248           | 0.004                         |
| 0.20706        | 3.64159 | 9.88190           | 2.27983           | 0.005                         |
| 0.29993        | 3.86089 | 10.41531          | 1.92782           | 0.002                         |
| 0.39772        | 4.05337 | 10.69395          | 1.63448           | 0.001                         |
| 0.49990        | 4.22402 | 10.80647          | 1.47901           | 0.001                         |
| 0.59999        | 4.36861 | 10.83567          | 1.39388           | 0.001                         |
| 0.69954        | 4.49582 | 10.87391          | 1.34518           | 0.002                         |
| 0.79981        | 4.60994 | 10.92948          | 1.27091           | 0.001                         |
| 0.89918        | 4.71221 | 10.98641          | 1.13189           | 0.001                         |
| 1 <sup>a</sup> | 4.80660 | 10.97474          | 0.93698           | 0.001                         |
| 1              | 4.80657 | 10.96702          | 0.93349           | 0.002                         |

<sup>a</sup>chemical used in the thermodynamic experiments

Speed of ultrasound in the system N-methylpiperidine (1) + water (2)

| $x_1$   | $t / ^\circ\text{C}$ | $u / (\text{m s}^{-1})$ | $x_1$   | $t / ^\circ\text{C}$ | $u / (\text{m s}^{-1})$ | $x_1$   | $t / ^\circ\text{C}$ | $u / (\text{m s}^{-1})$ |
|---------|----------------------|-------------------------|---------|----------------------|-------------------------|---------|----------------------|-------------------------|
| 0.00034 | 19.41                | 1482.51                 | 0.06008 | 18.52                | 1541.06                 | 0.39772 | 19.50                | 1380.16                 |
|         | 24.39                | 1496.86                 |         | 23.34                | 1531.43                 |         | 24.35                | 1359.59                 |
|         | 28.62                | 1507.62                 |         | 27.54                | 1522.11                 |         | 28.42                | 1342.37                 |
|         | 33.53                | 1518.36                 |         | 32.46                | 1509.73                 |         | 33.32                | 1321.70                 |
|         | 38.50                | 1527.58                 |         | 37.43                | 1495.22                 |         | 38.36                | 1300.56                 |
| 0.00067 | 19.43                | 1484.47                 | 0.07007 | 19.40                | 1532.86                 | 0.49990 | 19.35                | 1349.16                 |
|         | 24.39                | 1498.60                 |         | 24.36                | 1521.36                 |         | 24.30                | 1327.90                 |
|         | 28.64                | 1509.23                 |         | 28.64                | 1510.46                 |         | 28.57                | 1309.74                 |
|         | 33.54                | 1519.85                 |         | 33.60                | 1496.27                 |         | 33.58                | 1288.58                 |
|         | 38.52                | 1528.87                 |         | 38.58                | 1479.67                 |         | 38.64                | 1267.34                 |
| 0.00364 | 19.44                | 1501.73                 | 0.07999 | 19.39                | 1526.71                 | 0.59999 | 19.46                | 1322.99                 |
|         | 24.34                | 1514.12                 |         | 24.37                | 1513.99                 |         | 24.38                | 1301.86                 |
|         | 28.60                | 1523.49                 |         | 28.67                | 1501.98                 |         | 28.59                | 1283.88                 |
|         | 33.51                | 1532.73                 |         | 33.64                | 1486.52                 |         | 33.50                | 1263.07                 |
|         | 38.51                | 1540.46                 |         | 38.64                | 1468.66                 |         | 38.46                | 1242.27                 |
| 0.01002 | 19.46                | 1535.74                 | 0.09000 | 19.47                | 1520.09                 | 0.69954 | 19.44                | 1302.00                 |
|         | 24.37                | 1544.63                 |         | 24.27                | 1506.67                 |         | 24.33                | 1280.84                 |
|         | 28.56                | 1550.89                 |         | 28.51                | 1494.03                 |         | 28.58                | 1262.66                 |
|         | 33.50                | 1556.81                 |         | 33.52                | 1477.72                 |         | 33.48                | 1241.84                 |
|         | 38.46                | 1561.23                 |         | 38.47                | 1459.20                 |         | 38.46                | 1220.86                 |
| 0.02001 | 19.40                | 1567.30                 | 0.09996 | 19.39                | 1514.65                 | 0.79981 | 19.45                | 1284.75                 |
|         | 24.37                | 1566.60                 |         | 24.38                | 1499.98                 |         | 24.37                | 1263.27                 |
|         | 28.63                | 1565.28                 |         | 28.66                | 1486.45                 |         | 28.60                | 1245.02                 |
|         | 33.59                | 1562.98                 |         | 33.62                | 1469.42                 |         | 33.50                | 1224.02                 |
|         | 38.66                | 1560.04                 |         | 38.61                | 1450.47                 |         | 38.47                | 1202.96                 |
| 0.03066 | 18.47                | 1562.79                 | 0.15027 | 19.53                | 1486.37                 | 0.89918 | 19.44                | 1270.87                 |
|         | 23.38                | 1558.06                 |         | 24.39                | 1469.18                 |         | 24.38                | 1249.10                 |
|         | 27.05                | 1554.33                 |         | 28.60                | 1453.62                 |         | 28.60                | 1230.62                 |
|         | 32.48                | 1547.92                 |         | 33.45                | 1434.89                 |         | 33.47                | 1209.51                 |
|         | 37.44                | 1541.31                 |         | 38.42                | 1414.55                 |         | 38.44                | 1188.24                 |
| 0.04001 | 19.40                | 1554.14                 | 0.20002 | 19.47                | 1460.82                 | 1       | 19.45                | 1259.66                 |
|         | 24.39                | 1547.49                 |         | 24.37                | 1442.16                 |         | 24.37                | 1237.58                 |
|         | 28.66                | 1541.30                 |         | 28.59                | 1425.65                 |         | 28.62                | 1218.82                 |
|         | 33.59                | 1532.91                 |         | 33.51                | 1405.87                 |         | 33.56                | 1197.30                 |
|         | 38.57                | 1522.52                 |         | 38.47                | 1385.29                 |         | 38.52                | 1175.99                 |
| 0.05001 | 19.41                | 1546.48                 | 0.29993 | 19.38                | 1417.08                 |         |                      |                         |
|         | 24.38                | 1538.03                 |         | 24.36                | 1396.71                 |         |                      |                         |
|         | 28.67                | 1529.92                 |         | 28.66                | 1379.06                 |         |                      |                         |
|         | 33.63                | 1518.92                 |         | 33.64                | 1358.40                 |         |                      |                         |
|         | 38.62                | 1506.05                 |         | 38.65                | 1337.48                 |         |                      |                         |

Coefficients of the speed of sound polynomials for N-methylpiperidine (1) + water (2):

$$u / (\text{m s}^{-1}) = \sum_{i=0}^n b_i (T / \text{K} - 298.15)^i \quad (\text{Eq. 7})$$

and standard deviations of the fit  $\delta$

| $x_1$   | $b_0$            | $b_1$            | $b_2 \times 10^3$ | $b_3 \times 10^4$ | $\delta$ |
|---------|------------------|------------------|-------------------|-------------------|----------|
| 0.00034 | 1498.477 ± 0.032 | 2.6497 ± 0.0059  | -3.674 ± 0.060    |                   | 0.05     |
| 0.00067 | 1500.193 ± 0.013 | 2.6162 ± 0.0025  | -3.663 ± 0.025    |                   | 0.02     |
| 0.00364 | 1515.640 ± 0.014 | 2.3055 ± 0.0027  | -3.471 ± 0.027    |                   | 0.02     |
| 0.01002 | 1545.613 ± 0.025 | 1.5999 ± 0.0047  | -3.276 ± 0.048    |                   | 0.04     |
| 0.02001 | 1566.391 ± 0.041 | -0.2549 ± 0.0077 | -1.553 ± 0.077    |                   | 0.07     |
| 0.03066 | 1556.450 ± 0.055 | -1.0363 ± 0.0118 | -1.172 ± 0.173    | -0.23 ± 0.18      | 0.07     |
| 0.04001 | 1546.650 ± 0.021 | -1.3961 ± 0.0034 | -1.566 ± 0.076    | -0.92 ± 0.06      | 0.02     |
| 0.05001 | 1536.938 ± 0.055 | -1.8291 ± 0.0088 | -2.495 ± 0.198    | -0.53 ± 0.15      | 0.06     |
| 0.06008 | 1527.866 ± 0.010 | -2.1979 ± 0.0020 | -2.602 ± 0.032    | -0.67 ± 0.03      | 0.01     |
| 0.07007 | 1519.797 ± 0.015 | -2.4543 ± 0.0025 | -2.614 ± 0.055    | -0.79 ± 0.04      | 0.02     |
| 0.07999 | 1512.288 ± 0.017 | -2.6977 ± 0.0028 | -2.676 ± 0.061    | -0.73 ± 0.05      | 0.02     |
| 0.09000 | 1504.543 ± 0.045 | -2.8984 ± 0.0074 | -2.111 ± 0.166    | -1.01 ± 0.13      | 0.05     |
| 0.09996 | 1498.069 ± 0.006 | -3.0768 ± 0.0010 | -2.456 ± 0.023    | -0.46 ± 0.02      | 0.01     |
| 0.15027 | 1466.963 ± 0.016 | -3.6349 ± 0.0027 | -1.732 ± 0.061    | -0.21 ± 0.05      | 0.02     |
| 0.20002 | 1439.736 ± 0.014 | -3.8769 ± 0.0026 | -1.227 ± 0.026    |                   | 0.02     |
| 0.29993 | 1394.095 ± 0.015 | -4.1030 ± 0.0027 | -0.324 ± 0.027    |                   | 0.02     |
| 0.39772 | 1356.824 ± 0.018 | -4.2335 ± 0.0035 | 0.167 ± 0.036     |                   | 0.03     |
| 0.49990 | 1324.937 ± 0.007 | -4.2653 ± 0.0013 | 0.323 ± 0.013     |                   | 0.01     |
| 0.59999 | 1299.185 ± 0.009 | -4.2757 ± 0.0017 | 0.359 ± 0.018     |                   | 0.02     |
| 0.69954 | 1277.970 ± 0.016 | -4.2974 ± 0.0029 | 0.400 ± 0.029     |                   | 0.03     |
| 0.79981 | 1260.553 ± 0.013 | -4.3342 ± 0.0024 | 0.434 ± 0.024     |                   | 0.02     |
| 0.89918 | 1246.365 ± 0.013 | -4.3858 ± 0.0025 | 0.452 ± 0.025     |                   | 0.02     |
| 1       | 1234.799 ± 0.008 | -4.4396 ± 0.0015 | 0.664 ± 0.016     |                   | 0.01     |

Coefficients of the empirical polynomial:

$$\frac{Z^E}{x_1 x_2} = \sum_{i=0}^5 \sum_{j=0}^3 a_{ij} c^i \vartheta^j, \quad (\text{Eq. 15})$$

for the excess molar volumes  $Z = V \times 10^6 / (\text{m}^3 \text{mol}^{-1})$  at  $T = (288.15 - 313.15) \text{ K}$  and for the excess molar isentropic compressions  $Z = K_S \times 10^{15} / (\text{m}^3 \text{mol}^{-1} \text{Pa}^{-1})$  at  $T = (291.15 - 311.15) \text{ K}$ .  $c = x_1 / (x_1 + x_2 / 15)$ ,  $\vartheta = T / \text{K} - 298.15$ ,  $r$  is the correlation coefficient

| $i$ | $j$ | $V^E; r = 0.9980$    |     | $K_S^E; r = 0.9987$  |     |
|-----|-----|----------------------|-----|----------------------|-----|
|     |     | $a_{ij} \times 10^n$ | $n$ | $a_{ij} \times 10^n$ | $n$ |
| 0   | 0   | -128.75 ± 0.48       | 1   | -128.75 ± 0.46       | 0   |
| 0   | 1   | -1.21 ± 0.11         | 1   | 2.73 ± 0.61          | 1   |
| 0   | 2   | 0                    |     | -1.69 ± 0.81         | 2   |
| 0   | 3   | 4.28 ± 0.72          | 4   | 0.60 ± 0.54          | 3   |
| 1   | 0   | -8.55 ± 0.43         | 0   | 0                    |     |
| 1   | 1   | 10.14 ± 0.89         | 1   | 0                    |     |
| 1   | 2   | 0                    |     | 0                    |     |
| 1   | 3   | -0.58 ± 0.11         | 2   | 0                    |     |
| 2   | 0   | 0                    |     | 6.17 ± 0.10          | -2  |
| 2   | 1   | -1.31 ± 0.16         | 0   | 0.32 ± 0.12          | -1  |
| 2   | 2   | 0                    |     | 1.26 ± 0.82          | 2   |
| 2   | 3   | 2.88 ± 0.71          | 2   | 0                    |     |
| 3   | 0   | 15.21 ± 0.48         | -1  | -10.90 ± 0.24        | -2  |
| 3   | 1   | 0                    |     | -1.00 ± 0.29         | -1  |
| 3   | 2   | 0                    |     | 0                    |     |
| 3   | 3   | -0.66 ± 0.18         | 1   | 0                    |     |
| 4   | 0   | -27.83 ± 0.89        | -1  | 5.68 ± 0.15          | -2  |
| 4   | 1   | 4.31 ± 0.85          | 1   | 0.63 ± 0.18          | -1  |
| 4   | 2   | 0                    |     | 0                    |     |
| 4   | 3   | 0.70 ± 0.20          | 1   | 0                    |     |
| 5   | 0   | 14.23 ± 0.45         | -1  | 0                    |     |
| 5   | 1   | 0                    |     | 0                    |     |
| 5   | 2   | 0                    |     | 0                    |     |
| 5   | 3   | -2.73 ± 0.81         | 2   | 0                    |     |
